# Supplementary material
Source: publisher site journal article supplement (https://www.spandidos-publications.com/534/downloadSupplementary)

Figure S1. HBV infection decreases OS and PFS. (A) OS and (B) PFS of patients with active HBV infection, chronic HBV infection, resolved infection and HBV negative status. HBV, hepatitis B virus; OS, overall survival; PFS, progression-free survival.

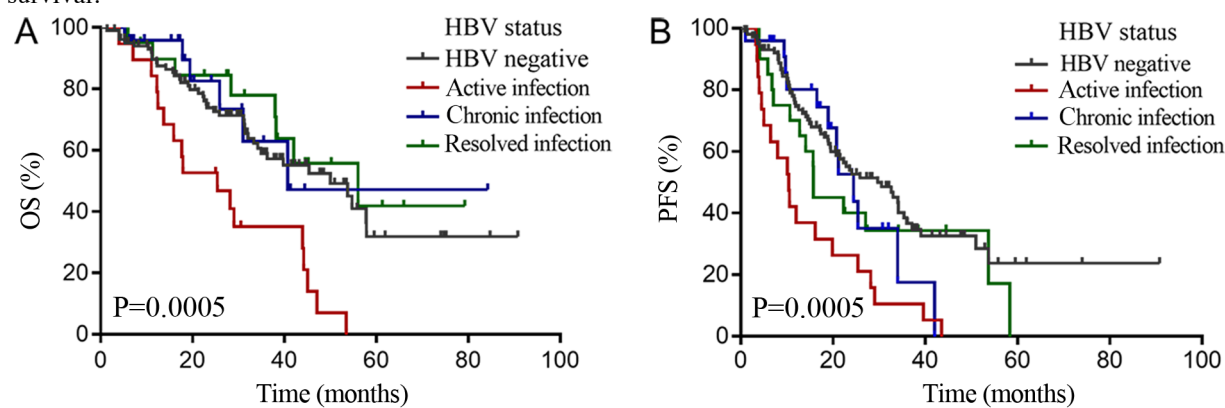

Supplement: Supplementary file 1 [file downloadSupplementary]
